# Supplementary material
Source: publisher figshare collection journal article supplement (https://tandf.figshare.com/articles/dataset/_/7756823)
Supplement: Supplementary file 1 [file 1 › JASA_ACS_author_form_blinded.pdf]

## **JASA ACS Reproducibility Initiative - Author Contributions Checklist Form**

The purpose of the Author Contributions Checklist (ACC) Form is to document the code and data supporting a manuscript, and describe how to reproduce its main results.

As of Sept. 1, 2016, the ACC Form must be included with all new submissions to JASA ACS.

This document is the initial version of the template that will be provided to authors. The JASA Associate Editors for Reproducibility will update this document with more detailed instructions and information about best practices for many of the listed requirements over time.

### **Data**

#### **Abstract (Mandatory)**

Electrode data for laboratory experiment intended to mimic industrial hydrocyclone equipment.

#### **Availability (Mandatory)**

These data are hosted on the public GitHub site along with the code used in this work.

The address is: **[BLINDED]**

#### **Description (Mandatory if data available)**

The author **[BLINDED]** was involved in the production of these data, which is not under any form of restriction or copyright. These data were previously described in detail and analysed in **[BLINDED]**.

File name: ST1trial3.dat

#### **Optional Information (complete as necessary)**

NA

### **Code**

#### **Abstract (Mandatory)**

Python code to implement probabilistic numerical methods and to reproduce all experiments.

#### **Description (Mandatory)**

Available on the public GitHub site, with no restrictions.

Each experiment is contained in an iPython notebook and full scripts to reproduce each experiment are included.

Version information: Latest GitHub commit at time of submission is d3d055c.

#### **Optional Information (complete as necessary)**

Python dependencies: matplotlib, numpy

## Instructions for Use

### **Reproducibility (Mandatory)**

All figures from paper can be reproduced from the scripts that are provided.

In each case a notebook is provided to show exactly how each result was obtained.

### **Replication (Optional)**

Software can be downloaded from GitHub for use in other contexts.

## Notes

NA
